# Supplementary material
Source: PubMed Central journal article supplement (PMC7386247)
Supplement: NIHMS1599826-supplement-Methods.pdf [file NIHMS1599826-supplement-Methods.pdf]

### **DNA template preparation for *in vitro* transcription**

The sequences for all the RNA constructs used in this study are listed in Supplementary Table 1. cDNAs of all RNA constructs (except 19mer) were ordered either as gBlocks (for long transcripts >41 nt) or as standard DNA oligonucleotides (for short transcripts <42 nt) from IDT, incorporating the T7 promoter on the 5'-end. If ordered as a gBlock, primers flanking the cDNA but containing the EcoRI and BamHI cut sites on the 5' and 3' ends respectively were used to PCR amplify the gBlock for restriction enzyme cloning into a pUC19 vector. Ligated plasmids were verified using Sanger sequencing (Quintara Biosciences) prior to DNA transcription template generation via PCR. For these long transcripts, standard PCR using the cloned vector was used to generate dsDNA *in vitro* transcription templates for run-off transcription. For short transcripts, sense and antisense DNA oligos are annealed at 2  $\mu$ M (5 min 95°C, slow cool to 25°C in 10 mM Tris (pH 7.5), 1 mM EDTA, 50 mM NaCl) to generate dsDNA *in vitro* transcription templates for run-off transcription.

### **RNA transcription**

RNAs were prepared by performing *in vitro* transcription on dsDNA templates with in-house prepared T7 polymerase (Batey Lab, CU Boulder)<sup>1</sup>. Transcription reactions were gel purified on 5-12% acrylamide, 8 M urea, 1X TBE slab gels<sup>2</sup>. Purified RNA concentrations and quality were assessed by the  $A_{260}$  and the  $A_{260}/A_{280}$  ratio. RNA transcription products were qualitatively assessed for purity using denaturing gel electrophoresis (Supplementary Figure 2). Concentrations were calculated using the extinction coefficient provided for each RNA sequence by the Scripps extinction coefficient calculator (adapted and utilized in: <http://www.fechem.uzh.ch/MT/links/ext.html>). Typically, a 200  $\mu$ L transcription reaction yielded 2.5 nmol of RNA and had a  $A_{260}/A_{280}$  ratio of 2.0.

### **Fluorescent End-labeling of RNA**

Purified RNA was 3'-end labeled with fluorescein-5-thiosemicarbazide (FTSC, Sigma) to perform fluorescence binding assays using a published protocol<sup>3,4</sup>. Importantly, this method only labels RNA, not DNA, because of the requirement of an adjacent 2'-OH. Fluorescein labeled products were qualitatively assessed for purity and labeling efficiency via denaturing gel electrophoresis (Supplementary Figure 3). The Cy2 filter on the Typhoon imager (GE Healthcare) was used to visualize the attached label. RNA concentrations were determined post-labeling by  $A_{260}$  measurements. FTSC-labeled RNA was stored in dark amber tubes at -20°C.

### **Treatment of RNA with RNase and DNase**

1.4 units of DNaseI (NEB) or 0.15  $\mu$ g/mL of in-house RNase A were added to 10  $\mu$ L reactions containing 5 – 10  $\mu$ M of purified RNA in 1x DNaseI buffer (10 mM Tris pH 7.6, 2.5 mM MgCl<sub>2</sub>, 0.5 mM CaCl<sub>2</sub>) and allowed to react for 45-55 min at 37°C. The reactions were aliquoted and stored at -20°C. Thawed aliquots were used to perform PARP activity assays and analysis by native polyacrylamide gel analysis followed by SYBR Green II staining.

## Expression and Purification of PARP1

Wild-type human PARP1 and PARP2 were expressed and purified from *E. coli* as previously described<sup>5</sup> with the minor modification that both PARP1 and PARP2 were eluted from the nickel-NTA column using a gradient from 20 – 400 mM imidazole.

## Binding of RNA to PARP1/2 as detected by fluorescence polarization

PARP1 was serially diluted (1.5:1) from 2  $\mu$ M in binding buffer (50 mM Tris-HCl, pH 8.0, 50 mM NaCl, 1 mM MgCl<sub>2</sub>, 0.1 mM EDTA, 0.01% IGEPAL) in rows of a 96-well plate (Costar3898), and 10  $\mu$ L of each dilution were transferred to rows of a 384-well plate (Costar9017) with the last four columns containing only buffer as a control.

Fluorescently labeled RNAs were diluted to 10 nM in binding buffer, heated to 95°C for 45 seconds, and then chilled on ice for 5+ min. Individual diluted RNAs were then added to rows of the 384-well plate. The fluorescent polarization (FP) signal was measured using a BMG Labtech Clariostar instrument with excitation at 482 nm, a 504 nm dichroic cut-off filter, and 530 nm emission. Binding constants ( $K_d$ ) were determined by fitting the observed fluorescence polarization signal ( $FP_{obs}$ )

$$FP_{obs} = FP_{min} + \left\{ (FP_{max} - FP_{min}) * ((K_d + P + R) - \sqrt{(K_d + P + R)^2 - 4 * P * R}) \right\} / 2R$$

where  $FP_{max}$  is the highest observed FP signal at saturation,  $FP_{min}$  is the lowest FP measured in the control wells in the absence of protein (fixed at control value), P is the concentration of protein (0.06 – 1000 nM), and R is the concentration of the probe RNA (5 nM). Control experiments using RNase treated RNA showed no change in FP signal, indicating that FITC dye alone does not bind to either PARP1 or PARP2.

## PARP1/2 activity as detected by incorporation of <sup>32</sup>P-ADPR

PARP1 (30 nM) or PARP2 (60 nM) were pre-incubated with varying concentrations of DNA (0.01 – 200 nM final) or fixed concentrations of RNA (1  $\mu$ M) in assay buffer (50 mM Tris-HCl, pH 8.0, 50 mM NaCl, 1 mM MgCl<sub>2</sub>, 0.1 mM EDTA, 0.5 mg/mL bovine serum albumin (Ambion)) in 96-well plates (Costar3898). Following addition of <sup>32</sup>P-NAD<sup>+</sup> (40  $\mu$ M, 1.8 x 10<sup>6</sup> cpm/well, PerkinElmer) to yield a final volume of 25  $\mu$ L, reactions were quenched at 30 s by addition of 50  $\mu$ L of 30% trichloroacetic acid (TCA). Samples (50  $\mu$ L of total) were then loaded onto a Whatman Mini-Fold Spot-Blot apparatus containing a Whatman GF/C glass microfiber filter. Each well was washed three times with 10% TCA (100  $\mu$ L). After removal of the filter from the apparatus, the filter was gently incubated in 10% TCA (20 – 40 mL) for three more washes. After drying, the filter was exposed to a phosphorimager screen overnight (GE Healthcare) and imaged using a Typhoon 9500 (GE Healthcare). Spot intensities were quantitated using ImageQuant. Activation constants for DNA ( $K_{act}$ ) were determined by fitting the observed incorporation of radioactivity (cpm<sub>obs</sub>) to

$$cpm_{obs} = cpm_{min} + \frac{(cpm_{max} - cpm_{min})}{\left(1 + \left(\frac{[DNA]}{K_{act}}\right)\right)}$$

where  $cpm_{\min}$  is derived from control samples containing no DNA activator,  $cpm_{\max}$  is the highest observed incorporation, and  $[DNA]$  is the concentration of DNA. The percentage of activation by RNA ( $\%_{act}$ ) was determined by fitting to

$$\%_{act} = \frac{(cpm_{\max(RNA)} - cpm_{\min(control)})}{(cpm_{\max(DNA)} - cpm_{\min(control)})}$$

where  $cpm_{\min}$  is derived from control samples containing no DNA activator,  $cpm_{\max(DNA)}$  is the highest observed incorporation at 200 nM DNA (saturating), and  $cpm_{\max(RNA)}$  is the highest observed incorporation at 1  $\mu$ M RNA. Control experiments using assay buffer as above with 12.5 mM  $MgCl_2$  to compare with other published assay conditions showed  $K_{act}$  for DNA to increase 20 – 50-fold for both PARP1 and PARP2 compared to 1 mM  $MgCl_2$ , and did not lead to RNA-mediated activation of either PARP1 or PARP2 (data not shown).

## References

- (1) Milligan, J. F.; Groebe, D. R.; Witherell, G. W.; Uhlenbeck, O. C. Oligoribonucleotide Synthesis Using T7 RNA Polymerase and Synthetic DNA Templates. *Nucleic Acids Res.* **1987**, *15* (21), 8783–8798. <https://doi.org/10.1093/nar/15.21.8783>.
- (2) Nilsen, T. W. Gel Purification of RNA. *Cold Spring Harb. Protoc.* **2013**, *2013* (2), pdb.prot072942. <https://doi.org/10.1101/pdb.prot072942>.
- (3) Zearfoss, N. R.; Ryder, S. P. End-Labeling Oligonucleotides with Chemical Tags After Synthesis. In *Recombinant and In Vitro RNA Synthesis: Methods and Protocols*; Conn, G. L., Ed.; Methods in Molecular Biology; Humana Press: Totowa, NJ, 2012; pp 181–193. [https://doi.org/10.1007/978-1-62703-113-4\\_14](https://doi.org/10.1007/978-1-62703-113-4_14).
- (4) Parsonnet, N. V.; Lammer, N. C.; Holmes, Z. E.; Batey, R. T.; Wuttke, D. S. The Glucocorticoid Receptor DNA-Binding Domain Recognizes RNA Hairpin Structures with High Affinity. *Nucleic Acids Res.* **2019**. <https://doi.org/10.1093/nar/gkz486>.
- (5) Langelier, M.-F., Planck, J. L., Servent, K. M., and Pascal, J. M. (2011) Purification of Human PARP-1 and PARP-1 Domains from Escherichia coli for Structural and Biochemical Analysis, in *Methods in Molecular Biology*, pp 209–226.
